# Supplementary material for: Peripheral Endocannabinoid Components and Lipid Plasma Levels in Patients with Resistant Migraine and Co-Morbid Personality and Psychological Disorders: A Cross-Sectional Study
Source: MDPI journal article supplement (doi:10.3390/ijms25031893), 2024-02-04
Supplement: s1 [file s1]

**Supplementary Table S1.** Patients’ distribution (absolute value) across PD/wPD and MD/wMD groups.

|     | PD       | wPD      |
|-----|----------|----------|
| MD  | 21 (40%) | 10 (20%) |
| wMD | 10 (20%) | 10 (20%) |

**Note.** PD = Personality Disorder, wPD = without Personality Disorder, MD = Mood Disorder, wMD = without Mood Disorder.
